# Supplementary material for: Teaching Hands-Only CPR in Schools: A Program Evaluation in San José, Costa Rica
Source: PubMed Central journal article supplement (PMC6748223; doi:10.29024/aogh.2367), 2018-11-05
Supplement: agh-84-4-2367-s1.pdf [file agh-84-4-2367-s1.pdf]

## Quiz\*

1. When you are doing CPR, how many times per minute should you push on the center of a person's chest?
  - a. At least 50
  - b. At least 150
  - c. At least 100
  - d. I don't know
  
2. When should you stop pushing on a person's chest during CPR?
  - a. 5 minutes
  - b. Until I get tired
  - c. Until the health professionals arrive
  - d. I don't know
  
3. How deep should you push on the chest of an adult during CPR?
  - a. 2.5 cm
  - b. 5 cm
  - c. 7.5 cm
  - d. I don't know
  
4. What are the correct steps of "hands-only" CPR?
  - a. Call 9-1-1 and then push hard and fast on the center of the person's chest until a health professional arrives
  - b. Push hard and fast on the center of the chest and then call 9-1-1
  - c. Give the person 2 breaths mouth-to-mouth and then call 9-1-1
  - d. I don't know
  
5. Would you feel comfortable doing CPR on someone who had a cardiac arrest?
  - a. Yes
  - b. No

\*Correct answers for 1, 2, 3, and 4 are (c), (c), (b), and (a), respectively
